# Supplementary material for: ASM-3 Acid Sphingomyelinase Functions as a Positive Regulator of the DAF-2/AGE-1 Signaling Pathway and Serves as a Novel Anti-Aging Target
Source: PubMed Central journal article supplement (PMC3457945; doi:10.1371/journal.pone.0045890), 2012-09-25
Supplement: pone.0045890.s007.pdf [file pone.0045890.s007.pdf]

# Table S1

| Strain                            | nondauer (%) | dauer (%) | Total Number | nondauer (%) | dauer (%) | Total Number |
|-----------------------------------|--------------|-----------|--------------|--------------|-----------|--------------|
|                                   |              |           | 22.5°C       | 25°C         |           |              |
| wild-type (N2)                    | 100          | 0         | 279          | 100          | 0         | 810          |
| <i>asm-3(ok1744)</i>              | 100          | 0         | 246          | 100          | 0         | 846          |
| <i>daf-2(e1370)</i>               | 53.6         | 46.4      | 162          | 0            | 100       | 798          |
| <i>asm-3(ok1744);daf-2(e1370)</i> | 14           | 86        | 157          | 0            | 100       | 873          |
|                                   |              |           | 22.5°C       | 25°C         |           |              |
| wild-type (N2)                    | 100          | 0         | 562          | 100          | 0         | 752          |
| <i>asm-3(ok1744)</i>              | 100          | 0         | 617          | 100          | 0         | 765          |
| <i>age-1(mg305)</i>               | 97           | 3         | 687          | 0.9          | 99.1      | 853          |
| <i>asm-3(ok1744);age-1(mg305)</i> | 0.9          | 99.1      | 611          | 0.5          | 99.5      | 719          |
|                                   |              |           | 25°C         | 27°C         |           |              |
| wild-type (N2)                    | 100          | 0         | 712          | 96           | 4         | 658          |
| <i>asm-3(ok1744)</i>              | 100          | 0         | 709          | 95.5         | 4.5       | 710          |
| <i>pdk-1(sa709)</i>               | 100          | 0         | 801          | 0.4          | 99.6      | 631          |
| <i>asm-3(ok1744);pdk-1(sa709)</i> | 100          | 0         | 750          | 0.6          | 99.4      | 688          |
|                                   |              |           | 25°C         | 27°C         |           |              |
| wild-type (N2)                    | 100          | 0         | 373          | 100          | 0         | 518          |
| <i>asm-3(ok1744)</i>              | 100          | 0         | 430          | 100          | 0         | 504          |
| <i>akt-1(mg306)</i>               | 100          | 0         | 259          | 7.2          | 92.8      | 672          |
| <i>asm-3(ok1744);akt-1(mg306)</i> | 100          | 0         | 799          | 37.2         | 62.8      | 562          |
|                                   |              |           | 22.5°C       | 25°C         |           |              |
| wild-type (N2)                    | 100          | 0         | 1213         | 100          | 0         | 389          |
| <i>asm-3(ok1744)</i>              | 100          | 0         | 1194         | 100          | 0         | 484          |
| <i>daf-7(e1372)</i>               | 38           | 62        | 993          | 0            | 100       | 430          |
| <i>asm-3(ok1744);daf-7(e1372)</i> | 40           | 60        | 1437         | 0            | 100       | 518          |
